# Supplementary material
Source: ML conference proceedings conference paper supplement (https://openreview.net/forum?id=Xll01vw606)
Supplement: supplementary_material [file supp_proteins.pdf › supp_proteins.pdf]

---

# Ambient Proteins

## Training Diffusion Models on Noisy Structures

### Supplement

---

Anonymous Author(s)

Affiliation

Address

email

#### 1 A Evaluation Metrics

2 Evaluation of a protein generative model is challenging and there have been a few metrics that have  
3 been proposed. In what follows, we explain standard metrics in the protein-generative modeling  
4 literature that we will use in our Experimental Results section. Our experiments report using Proteína's  
5 definitions of the metrics when possible.

6 **Designability** (also referred to as refoldability) assesses the structural plausibility of generated  
7 proteins. Given a generated backbone, ProteinMPNN [1] generates eight plausible amino acid  
8 sequences for that backbone. ESMFold then folds each sequence and the resulting eight structures  
9 are compared to the original backbone. The self-consistency RMSD (scRMSD) is defined as the  
10 smallest root mean squared deviation between the generated backbone and each of the eight refolded  
11 structures. A backbone is considered *designable* if  $\text{scRMSD} < 2 \text{ \AA}$  and designability is defined as  
12 the percentage of generated backbones that meet this criterion.

**Diversity** quantifies the structural variability among the generated proteins. Designable backbones  
are clustered using Foldseek with a TM-score threshold of 0.5. Diversity is then defined as:

$$\text{Diversity} = \frac{\text{Number of Designable Clusters}}{\text{Number of Designable Samples}}.$$

13 This metric reflects the proportion of structurally distinct (i.e., non-redundant) designable backbones  
14 among all designable samples.

#### 15 B Secondary Structure conditioning

16 Previous work [2] has explored conditioning protein structure generation on CATH labels, a form of  
17 hierarchical classification derived from the orientation and spatial organization of protein secondary  
18 structures [5]. In this setting, every residue in a protein sequence is typically assigned the same CATH  
19 label. In contrast, we propose a more fine-grained approach. Rather than relying on the manually  
20 curated and coarse-grained CATH classification, we condition our model directly on secondary  
21 structure annotations at the residue level. Each residue is assigned a label corresponding to its local  
22 secondary structure (e.g., helix, strand, coil), allowing the model to leverage localized structural  
23 context during generation.

24 We train a variant of our model with partial conditioning, in which the model is conditioned on  
25 the secondary structure sequence, without introducing any additional modifications to the input or  
26 architecture. We show designable samples conditioned on the secondary structure extracted from real

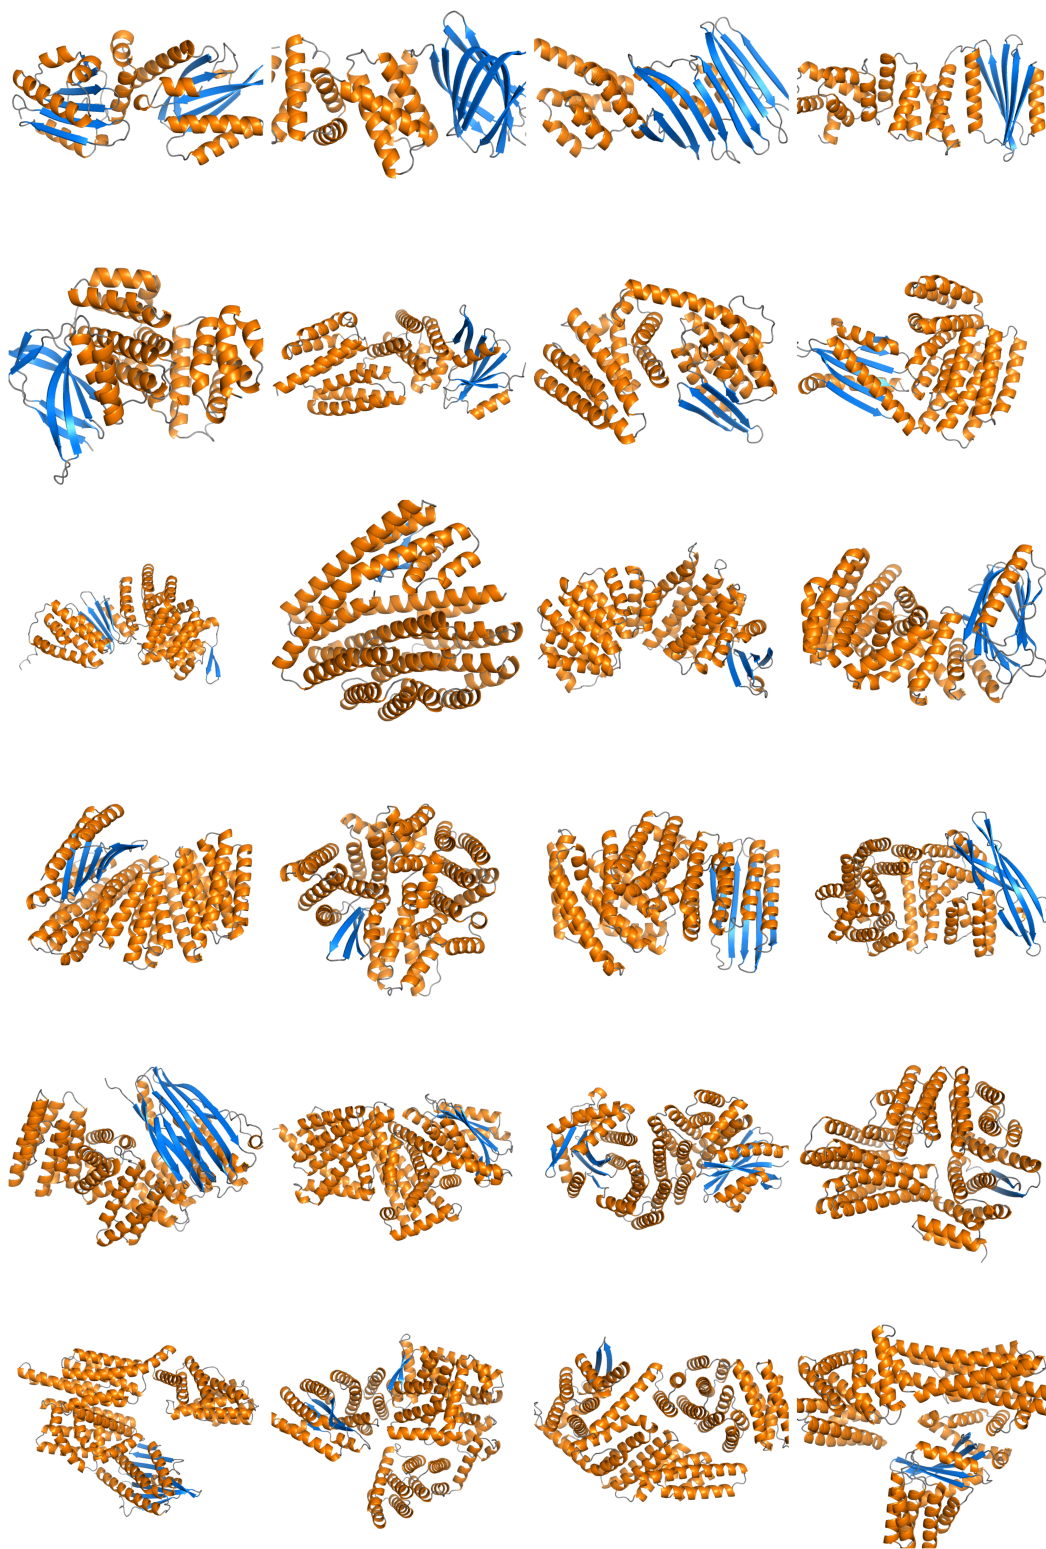

Figure 1: **Qualitative visualizations of unconditional generations.** Our model is capable of producing diverse, multi-domain long proteins.

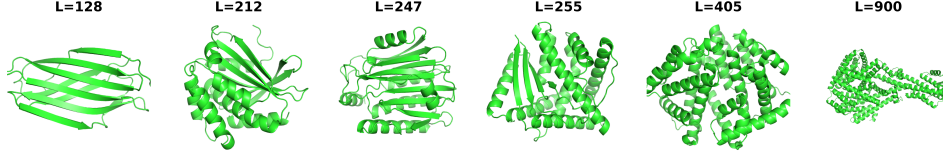

Figure 2: **Secondary Structure Conditioned Samples.** We generate proteins using a model variant trained with secondary structure conditioning. To guide generation, we extract secondary structure strings from existing proteins and use this coarse-grained structural representation as input. This conditioning enables the model to produce diverse and designable protein structures.

proteins in Figure 2. These results demonstrate that, even with coarse-grained secondary structure conditioning, our model can generate long, diverse proteins exhibiting a wide range of folds.

## C Model and Training Hyperparameters

Table 1 includes a more thorough list of the hyperparameters used for our experiments.

## D Full Motif Scaffolding Results

Table 2 and table 3 represent the numbers of unique successful scaffolds generated by Genie2 [3], RFDiffusion [6], Proteína [2] and *Ambient Protein Diffusion* for each motif in the benchmark dataset in Genie2.

## E Full Training Algorithm and Implementation Details

### E.1 Additional Implementation Details

**Loss buffer.** The loss rescaling introduced in the main paper ensures balanced weighting across noise levels. At the same time, it also introduces a potential instability: the loss explodes as  $\sigma(t)$  approaches  $\sigma(t_i)$ . To mitigate this instability, we define a buffer zone around each protein’s assigned noise level. Specifically, given a protein’s assigned noise level  $t_i$ , it is only used during training at timesteps  $t + \tau$ , where  $\tau$  is a buffer hyperparameter that controls the exclusion margin. This constraint prevents the model from encountering degenerate gradient behavior near the rescaling boundaries and is only applied to medium and low confidence structures (pLDDT < 90). We underline that is similar to how in normal diffusion there is a buffer time zone around  $t = 0$  that is never sampled.

**Ambient in high-noise regime.** As explained in the main paper, each protein is only used for a subset of diffusion times according to its average pLDDT value. The proteins that have super high PLDDT (> 90) are considered clean data and can be used with the normal training objective. However, as found in [4], using the Ambient training objective for high-noise might be useful even if clean data is available. Intuitively, this objective prevents memorization and promotes diversity in the outputs. We ablated this design choice, and we found a slight increase in diversity for the same designability by using this. Hence, we used this tool from [4] for all our Ambient Protein Diffusion trainings.

### E.2 Algorithm

We provide the full algorithm in Algorithm 1. We commit to open-sourcing our code and models to facilitate the broader adoption of our method from the community.

| Hyperparameter              | Genie2 (repro)       | <i>Ambient</i> (Stage 1) | Stage 2              | Stage 3              |
|-----------------------------|----------------------|--------------------------|----------------------|----------------------|
| <i>Diffusion</i>            |                      |                          |                      |                      |
| Number of timesteps         | 1,000                | -                        | -                    | -                    |
| Noise schedule              | Cosine               | -                        | -                    | -                    |
| Ambient walls               | -                    | (600,900)                | (600,900)            | (600,900)            |
| <i>Model Architecture</i>   |                      |                          |                      |                      |
| Single feature dimension    | 384                  | -                        | -                    | -                    |
| Pair feature dimension      | 128                  | -                        | -                    | -                    |
| Pair transform layers       | 5                    | 8                        | 8                    | 8                    |
| Pair drop path rate         | 0.0                  | 0.1                      | 0.1                  | 0.1                  |
| Triangle dropout            | 0.25                 | -                        | -                    | -                    |
| Structure layers            | 8                    | -                        | -                    | -                    |
| <i>Training</i>             |                      |                          |                      |                      |
| Optimizer                   | AdamW                | -                        | -                    | -                    |
| Number of training proteins | 586k                 | 196k                     | 269k                 | 291k                 |
| Number epochs               | 40                   | 200                      | 50                   | 20                   |
| Warmup iterations           | 10,000               | 1,000                    | 500                  | 100                  |
| Total batch size            | 384                  | 384                      | 96                   | 48                   |
| Learning rate               | $1.0 \times 10^{-4}$ | $1.0 \times 10^{-4}$     | $1.0 \times 10^{-5}$ | $1.0 \times 10^{-5}$ |
| Weight decay                | 0.05                 | -                        | -                    | -                    |
| Minimum protein length      | 20                   | 20                       | 50                   | 50                   |
| Maximum protein length      | 256                  | 256                      | 512                  | 768                  |
| Minimum mean pLDDT          | 80                   | 70                       | 70                   | 70                   |
| <i>Compute Resources</i>    |                      |                          |                      |                      |
| Number of GPUs              | 48                   | 48                       | 48                   | 48                   |
| Training time               | 18 hr                | 18hr                     | 48hr                 | 48hr                 |

Table 1: **Hyperparameters of the diffusion protein model.** Dashes (-) indicate that the value is the same as the previous column. The Ambient walls correspond to the assigned diffusion times based on the protein’s PLDDT (times are from 1 to 1000). Proteins with PLDDT > 90 are used everywhere. Proteins with PLDDT > 80 are used for times in [600, 1000] and proteins with PLDDT > 70 are used for times in [900, 1000]. We underline that these hyperparameters were not particularly optimized, and even more benefits might be observed by properly tuning these values.



| <b>Motif Name</b> | Genie 2   | RFDiffusion | Proteína    | <i>Ambient Protein Diffusion</i> |
|-------------------|-----------|-------------|-------------|----------------------------------|
| <b>6E6R_long</b>  | 415       | 381         | <b>713</b>  | 601                              |
| <b>6EXZ_long</b>  | 326       | 167         | 290         | <b>432</b>                       |
| <b>6E6R_med</b>   | 272       | 151         | <b>417</b>  | 406                              |
| <b>1YCR</b>       | 134       | 7           | <b>249</b>  | 146                              |
| <b>5TRV_long</b>  | 97        | 23          | <b>179</b>  | 119                              |
| <b>6EXZ_med</b>   | 54        | 25          | 43          | <b>69</b>                        |
| <b>7MRX_128</b>   | 27        | 66          | <b>51</b>   | 44                               |
| <b>6E6R_short</b> | 26        | 23          | <b>56</b>   | 27                               |
| <b>5TRV_med</b>   | <b>23</b> | 10          | 22          | <b>23</b>                        |
| <b>7MRX_85</b>    | 23        | 13          | <b>31</b>   | 17                               |
| <b>3IXT</b>       | <b>14</b> | 3           | 8           | 4                                |
| <b>5TPN</b>       | 8         | 5           | 4           | <b>11</b>                        |
| <b>7MRX_60</b>    | <b>5</b>  | 1           | 2           | 1                                |
| <b>1QJG</b>       | <b>5</b>  | 1           | 3           | <b>5</b>                         |
| <b>5TRV_short</b> | <b>3</b>  | 1           | 1           | <b>3</b>                         |
| <b>5YUI</b>       | 3         | 1           | <b>5</b>    | 4                                |
| <b>4ZYP</b>       | 3         | 6           | <b>11</b>   | 3                                |
| <b>6EXZ_short</b> | 2         | 1           | <b>3</b>    | <b>3</b>                         |
| <b>1PRW</b>       | <b>1</b>  | <b>1</b>    | <b>1</b>    | <b>1</b>                         |
| <b>5IUS</b>       | <b>1</b>  | <b>1</b>    | <b>1</b>    | <b>1</b>                         |
| <b>1BCF</b>       | <b>1</b>  | <b>1</b>    | 1           | <b>1</b>                         |
| <b>5WN9</b>       | 1         | 0           | <b>2</b>    | 1                                |
| <b>2KL8</b>       | <b>1</b>  | <b>1</b>    | 1           | 1                                |
| <b>4JHW</b>       | 0         | 0           | 0           | 0                                |
| <b>Total</b>      | 1445      | 889         | <b>2094</b> | 1923                             |

Table 2: **Detailed single motif scaffolding results.** Ambient Protein Diffusion achieves superior results to Genie 2 and RFDiffusion and performs on par with Proteína. Crucially, our model achieves these results zero-shot, i.e., unlike Proteína, it is not optimized for motif scaffolding and still achieves comparable performance while being an order of magnitude smaller.

| <b>Motif Name</b> | Genie 2 | <i>Ambient Protein Diffusion</i> |
|-------------------|---------|----------------------------------|
| <b>3BIK+3BP5</b>  | 17      | <b>23</b>                        |
| <b>1PRW_four</b>  | 11      | <b>38</b>                        |
| <b>1PRW_two</b>   | 8       | <b>15</b>                        |
| <b>4JHW+5WN9</b>  | 4       | <b>12</b>                        |
| <b>2B5I</b>       | 0       | <b>1</b>                         |
| <b>3NTN</b>       | 0       | 0                                |
| <b>Total</b>      | 40      | <b>89</b>                        |

Table 3: **Multi-motif scaffolding results.** Ambient Protein Diffusion achieves consistently superior results to the predecessor Genie-2 model, despite using the same architecture, i.e. the benefit comes from better use of the data. The motif 2B5I is only solved by Ambient Protein Diffusion.

---

**Algorithm 1** Ambient Protein Diffusion: Training Algorithm.

---

**Require:** untrained network  $h_\theta$ , dataset  $\mathcal{D} = \{(x_0^{(i)}, \text{pLDDT}^{(i)})\}_{i=1}^N$ , pLDDT to diffusion time mapping function  $f : [0, 100] \mapsto \mathbb{R}^+$ , noise scheduling  $\sigma(t)$ , batch size  $B$ , diffusion time  $T$ , buffer  $\tau$ .

- 1:  $\tilde{\mathcal{D}} \leftarrow \left\{ \left( x_0^{(i)} + f(\text{pLDDT}^{(i)})\epsilon^{(i)}, f(\text{pLDDT}^{(i)}) \right) \mid (x_0^{(i)}, \text{pLDDT}^{(i)}) \in \mathcal{D}, \epsilon^{(i)} \sim \mathcal{N}(0, I_d) \right\} \triangleright$   
Noise each point in the training set according to its pLDDT and get (noisy, noise level) pairs.
- 2: **while** not converged **do**
- 3:    $t_s^{(1)}, \dots, t_s^{(B)} \leftarrow \text{Sample uniformly } B \text{ times in } [0, T] \triangleright \text{Sample diffusion times for this batch.}$
- 4:    $\tilde{\mathcal{D}}_p \leftarrow \text{shuffle}(\tilde{\mathcal{D}}) \triangleright \text{Shuffle dataset.}$
- 5:   loss  $\leftarrow 0 \triangleright \text{Initialize loss.}$
- 6:   pos  $\leftarrow 0 \triangleright \text{Initialize index at shuffled dataset.}$
- 7:   **for**  $i \in [1, B]$  **do**
- 8:     **while** True **do**  $\triangleright \text{find the first eligible point}$
- 9:        $y, t_y \leftarrow \tilde{\mathcal{D}}_p[\text{pos}]$
- 10:       **if**  $t_y \geq t_s^i + \tau$  **then**
- 11:         break
- 12:       **else**
- 13:         pos  $\leftarrow \text{pos} + 1 \triangleright \text{Move to the next point in the dataset.}$
- 14:       **end if**
- 15:     **end while**
- 16:      $\epsilon \sim \mathcal{N}(0, I) \triangleright \text{Sample noise.}$
- 17:      $t \leftarrow t_s^{(i)} \triangleright \text{Time to be used in this training update.}$
- 18:      $t_i \leftarrow t_y \triangleright \text{Assigned time based on the PLDDT value}$
- 19:      $x_{t_i} \leftarrow y \triangleright \text{Noised point to the assigned time.}$
- 20:      $x_t \leftarrow x_{t_i} + \sqrt{\sigma^2(t) - \sigma^2(t_i)}\epsilon \triangleright \text{Add additional noise.}$
- 21:      $\alpha(t, t_i) \leftarrow \frac{\sigma^2(t) - \sigma^2(t_i)}{\sigma^2(t)}$
- 22:      $w(t, t_i) \leftarrow \frac{\sigma^4(t)}{(\sigma^2(t) - \sigma^2(t_i))^2} \triangleright \text{Loss reweighting.}$
- 23:     loss  $\leftarrow \text{loss} + w(t, t_i) \|\alpha(t, t_i)h_\theta(x_t, t) + (1 - \alpha(t, t_i))x_t - x_{t_i}\|^2 \triangleright \text{Ambient loss}$
- 24:   **end for**
- 25:   loss  $\leftarrow \frac{\text{loss}}{B} \triangleright \text{Compute average loss.}$
- 26:    $\theta \leftarrow \theta - \eta \nabla_\theta \text{loss} \triangleright \text{Update network parameters via backpropagation.}$
- 27: **end while**

---

## References

- 55 [1] Justas Dauparas, Ivan Anishchenko, Nathaniel Bennett, Hua Bai, Robert J Ragotte, Lukas F  
56 Milles, Basile IM Wicky, Alexis Courbet, Rob J de Haas, Neville Bethel, et al. Robust deep  
57 learning-based protein sequence design using proteinmpnn. *Science*, 378(6615):49–56, 2022.
- 58 [2] Tomas Geffner, Kieran Didi, Zuobai Zhang, Danny Reidenbach, Zhonglin Cao, Jason Yim, Mario  
59 Geiger, Christian Dallago, Emine Kucukbenli, Arash Vahdat, et al. Proteina: Scaling flow-based  
60 protein structure generative models. *arXiv preprint arXiv:2503.00710*, 2025.
- 61 [3] Yeqing Lin, Minji Lee, Zhao Zhang, and Mohammed AlQuraishi. Out of many, one: Designing  
62 and scaffolding proteins at the scale of the structural universe with genie 2. *arXiv preprint*  
63 *arXiv:2405.15489*, 2024.
- 64 [4] Kulin Shah, Alkis Kalavasis, Adam R. Klivans, and Giannis Daras. Does generation require  
65 memorization? creative diffusion models using ambient diffusion, 2025.
- 66 [5] Ian Sillitoe, Nicola Bordin, Natalie Dawson, Vaishali P Waman, Paul Ashford, Harry M Scholes,  
67 Camilla SM Pang, Laurel Woodridge, Clemens Rauer, Neeladri Sen, et al. Cath: increased  
68 structural coverage of functional space. *Nucleic acids research*, 49(D1):D266–D273, 2021.
- 69 [6] Joseph L Watson, David Juergens, Nathaniel R Bennett, Brian L Trippe, Jason Yim, Helen E  
70 Eisenach, Woody Ahern, Andrew J Borst, Robert J Ragotte, Lukas F Milles, et al. De novo  
71 design of protein structure and function with rfdiffusion. *Nature*, 620(7976):1089–1100, 2023.
- 72
